# Supplementary material
Source: PubMed Central journal article supplement (PMC2783641)
Supplement: NIHMS136550-supplement-Supp_data.pdf [file NIHMS136550-supplement-Supp_data.pdf]

# Supplemental material

We provide parameters used for harmonic functions described by Eq. 18 to sample coordinates of fragments Ace, Ala, and Nme. For coordinates histogrammed from a short Langevin simulation we provide names of text files which are attached separately. Additional details regarding the use of the parameters can be found in the main text, Sec. IIG.

## I. PARAMETERS FOR FRAGMENT ACE

### A. Internal coordinate definitions for fragment Ace

|   |    |   |          |   |          |   |          |  |
|---|----|---|----------|---|----------|---|----------|--|
| 1 | CT |   |          |   |          |   |          |  |
| 2 | C  | 1 | $x_1$    |   |          |   |          |  |
| 3 | O  | 2 | $x_2$    | 1 | $x_3$    |   |          |  |
| 4 | HC | 1 | $x_4$    | 2 | $x_5$    | 3 | $x_6$    |  |
| 5 | HC | 1 | $x_7$    | 2 | $x_8$    | 3 | $x_9$    |  |
| 6 | HC | 1 | $x_{10}$ | 2 | $x_{11}$ | 3 | $x_{12}$ |  |
| 7 | N  | 2 |          | 1 | $x_{13}$ | 3 | $x_{14}$ |  |

**B. Parameters for bond lengths**

| Coordinate | $\bar{x}_i, \text{ \AA}$ | $\sigma_i^2, \text{ \AA}^2$ |
|------------|--------------------------|-----------------------------|
| $x_1$      | 1.5224                   | $9.233 \times 10^{-4}$      |
| $x_2$      | 1.23                     | $5.436 \times 10^{-4}$      |
| $x_4$      | 1.0911                   | $9.381 \times 10^{-4}$      |
| $x_7$      | 1.0911                   | $9.381 \times 10^{-4}$      |
| $x_{10}$   | 1.0911                   | $9.381 \times 10^{-4}$      |

**C. Parameters for bond angles**

| Coordinate | $\bar{x}_i, \text{ deg}$ | $\sigma_i^2, \text{ deg}^2$ |
|------------|--------------------------|-----------------------------|
| $x_3$      | 120.56                   | $2.955 \times 10^{-3}$      |
| $x_5$      | 110.44                   | $6.377 \times 10^{-3}$      |
| $x_8$      | 110.44                   | $6.377 \times 10^{-3}$      |
| $x_{11}$   | 110.44                   | $6.377 \times 10^{-3}$      |
| $x_{13}$   | 117.54                   | $2.424 \times 10^{-3}$      |

**D. Parameters for dihedrals**

| Coordinate | $\bar{x}_i, \text{ deg}$ | $\sigma_i^2, \text{ deg}^2$ |
|------------|--------------------------|-----------------------------|
| $x_{14}$   | 180.0                    | $6.872 \times 10^{-3}$      |

**E. Parameters for dependent dihedrals**

Dependent dihedrals are defined in terms of another dihedral which is sampled first. The equilibrium position for a dependent dihedral is described as  $\bar{x}_i = x_j + \overline{\Delta x_{ij}}$ , where  $x_j$  is the actual value of the dihedral on which  $x_i$  depends on and  $\overline{\Delta x_{ij}}$  is the average

equilibrium difference between dihedrals  $x_i$  and  $x_j$ . An example of a dependent dihedral can be hydrogen atoms in the methyl group. One of the hydrogens can be sampled first and then the other hydrogen atoms can be sampled based on the position of the first hydrogen.

| Coordinate | Depends on coordinate | $\overline{\Delta x_{ij}}$ , deg | $\sigma_i^2$ , deg <sup>2</sup> |
|------------|-----------------------|----------------------------------|---------------------------------|
| $x_9$      | $x_6$                 | -120.0                           | $1.273 \times 10^{-2}$          |
| $x_{12}$   | $x_6$                 | 120.0                            | $1.273 \times 10^{-2}$          |

#### F. Coordinates histogrammed from a Langevin simulation

Coordinates for which probability distributions were directly extracted from a short Langevin simulation are listed along with corresponding files. The file consists of two columns: first column is the coordinate and the second is the corresponding probability.

| Coordinate | File           |
|------------|----------------|
| $x_6$      | ace-x6-pdf.dat |

## II. PARAMETERS FOR FRAGMENT ALA

### A. Internal coordinate definitions for fragment Ala.

|    |    |    |          |   |          |   |          |
|----|----|----|----------|---|----------|---|----------|
| 1  | CT |    |          |   |          |   |          |
| 2  | C  | 1  |          |   |          |   |          |
| 3  | O  | 2  |          | 1 |          |   |          |
| 4  | N  | 2  | $x_1$    | 1 |          | 3 |          |
| 5  | CT | 4  | $x_2$    | 2 | $x_3$    | 1 | $x_4$    |
| 6  | C  | 5  | $x_5$    | 4 | $x_6$    | 2 | $x_7$    |
| 7  | O  | 6  | $x_8$    | 5 | $x_9$    | 4 | $x_{10}$ |
| 8  | H  | 4  | $x_{11}$ | 2 | $x_{12}$ | 1 | $x_{13}$ |
| 9  | HC | 5  | $x_{14}$ | 4 | $x_{15}$ | 2 | $x_{16}$ |
| 10 | CT | 5  | $x_{17}$ | 4 | $x_{18}$ | 2 | $x_{19}$ |
| 11 | HC | 10 | $x_{20}$ | 5 | $x_{21}$ | 4 | $x_{22}$ |
| 12 | HC | 10 | $x_{23}$ | 5 | $x_{24}$ | 4 | $x_{25}$ |
| 13 | HC | 10 | $x_{26}$ | 5 | $x_{27}$ | 4 | $x_{28}$ |
| 14 | N  | 6  |          | 5 | $x_{29}$ | 4 | $x_{30}$ |

## B. Parameters for bond lengths

| Coordinate | $\bar{x}_i, \text{Å}$ | $\sigma_i^2, \text{Å}^2$ |
|------------|-----------------------|--------------------------|
| $x_1$      | 1.337                 | $6.11 \times 10^{-4}$    |
| $x_2$      | 1.464                 | $8.573 \times 10^{-4}$   |
| $x_5$      | 1.541                 | $9.02 \times 10^{-4}$    |
| $x_8$      | 1.234                 | $7.462 \times 10^{-4}$   |
| $x_{11}$   | 1.012                 | $9.417 \times 10^{-4}$   |
| $x_{14}$   | 1.093                 | $9.249 \times 10^{-4}$   |
| $x_{17}$   | 1.542                 | $1.063 \times 10^{-3}$   |
| $x_{20}$   | 1.092                 | $9.417 \times 10^{-4}$   |
| $x_{23}$   | 1.092                 | $9.417 \times 10^{-4}$   |
| $x_{26}$   | 1.092                 | $9.417 \times 10^{-4}$   |

### C. Parameters for bond angles

| Coordinate | $\bar{x}_i$ , deg | $\sigma_i^2$ , deg <sup>2</sup> |
|------------|-------------------|---------------------------------|
| $x_3$      | 126.1             | $3.236 \times 10^{-3}$          |
| $x_6$      | 110.1             | $3.731 \times 10^{-3}$          |
| $x_9$      | 121.2             | $2.294 \times 10^{-3}$          |
| $x_{12}$   | 116.9             | $5.23 \times 10^{-3}$           |
| $x_{15}$   | 109.7             | $5.544 \times 10^{-3}$          |
| $x_{18}$   | 108.9             | $3.053 \times 10^{-3}$          |
| $x_{21}$   | 111.4             | $6.093 \times 10^{-3}$          |
| $x_{24}$   | 111.4             | $6.093 \times 10^{-3}$          |
| $x_{27}$   | 111.4             | $6.093 \times 10^{-3}$          |
| $x_{29}$   | 117.5             | $2.494 \times 10^{-3}$          |

### D. Parameters for dihedrals

| Coordinate | $\bar{x}_i$ , deg | $\sigma_i^2$ , deg <sup>2</sup> |
|------------|-------------------|---------------------------------|
| $x_4$      | 180.0             | $2.256 \times 10^{-2}$          |
| $x_{13}$   | 0.0               | $2.504 \times 10^{-2}$          |

**E. Parameters for dependent dihedrals**

| Coordinate | Depends on coordinate | $\overline{\Delta x_{ij}}$ , deg | $\sigma_i^2$ , deg <sup>2</sup> |
|------------|-----------------------|----------------------------------|---------------------------------|
| $x_{10}$   | $x_{30}$              | -180.0                           | $1.273 \times 10^{-2}$          |
| $x_{16}$   | $x_7$                 | 119.225                          | $1.273 \times 10^{-2}$          |
| $x_{19}$   | $x_7$                 | -120.596                         | $1.273 \times 10^{-2}$          |
| $x_{25}$   | $x_{22}$              | -120.0                           | $1.273 \times 10^{-2}$          |
| $x_{28}$   | $x_{22}$              | 120.0                            | $1.273 \times 10^{-2}$          |

**F. Coordinates histogrammed from a Langevin simulation.**

| Coordinate    | File             |
|---------------|------------------|
| $x_{22}$      | ala-x22-pdf.dat  |
| $x_7, x_{30}$ | ala-rama-pdf.dat |

### III. PARAMETERS FOR FRAGMENT NME

#### A. Internal coordinate definitions for fragment Nme

|   |    |   |          |   |          |   |          |
|---|----|---|----------|---|----------|---|----------|
| 1 | CT |   |          |   |          |   |          |
| 2 | C  | 1 |          |   |          |   |          |
| 3 | O  | 2 | 1        |   |          |   |          |
| 4 | N  | 2 | $x_1$    | 1 |          | 3 |          |
| 5 | CT | 4 | $x_2$    | 2 | $x_3$    | 1 | $x_4$    |
| 6 | H  | 4 | $x_5$    | 2 | $x_6$    | 1 | $x_7$    |
| 7 | HC | 5 | $x_8$    | 4 | $x_9$    | 2 | $x_{10}$ |
| 8 | HC | 5 | $x_{11}$ | 4 | $x_{12}$ | 2 | $x_{13}$ |
| 9 | HC | 5 | $x_{14}$ | 4 | $x_{15}$ | 2 | $x_{16}$ |

#### B. Parameters for bond lengths

| Coordinate | $\bar{x}_i, \text{Å}$ | $\sigma_i^2, \text{Å}^2$ |
|------------|-----------------------|--------------------------|
| $x_1$      | 1.337                 | $6.415 \times 10^{-4}$   |
| $x_2$      | 1.46                  | $7.779 \times 10^{-4}$   |
| $x_5$      | 1.0129                | $7.434 \times 10^{-4}$   |
| $x_8$      | 1.0916                | $9.85 \times 10^{-4}$    |
| $x_{11}$   | 1.0916                | $9.85 \times 10^{-4}$    |
| $x_{14}$   | 1.0916                | $9.85 \times 10^{-4}$    |



**C. Parameters for bond angles**

| Coordinate | $\bar{x}_i$ , deg | $\sigma_i^2$ , deg <sup>2</sup> |
|------------|-------------------|---------------------------------|
| $x_3$      | 125.0             | $3.398 \times 10^{-3}$          |
| $x_6$      | 116.66            | $5.141 \times 10^{-3}$          |
| $x_9$      | 110.5             | $6.909 \times 10^{-3}$          |
| $x_{12}$   | 110.5             | $6.909 \times 10^{-3}$          |
| $x_{15}$   | 110.5             | $6.909 \times 10^{-3}$          |

**D. Parameters for dihedrals**

| Coordinate | $\bar{x}_i$ , deg | $\sigma_i^2$ , deg <sup>2</sup> |
|------------|-------------------|---------------------------------|
| $x_4$      | 180.0             | $2.353 \times 10^{-2}$          |
| $x_7$      | 0.0               | $2.462 \times 10^{-2}$          |

**E. Parameters for dependent dihedrals**

| Coordinate | Depends on coordinate | $\overline{\Delta x_{ij}}$ , deg | $\sigma_i^2$ , deg <sup>2</sup> |
|------------|-----------------------|----------------------------------|---------------------------------|
| $x_{13}$   | $x_{10}$              | -120.0                           | $1.231 \times 10^{-2}$          |
| $x_{16}$   | $x_{10}$              | 120.0                            | $1.231 \times 10^{-2}$          |

**F. Coordinates histogrammed from a Langevin simulation.**

| Coordinate | File            |
|------------|-----------------|
| $x_{10}$   | nme-x10-pdf.dat |
